# Supplementary material for: Quantitative assessment of protein activity in orphan tissues and single cells using the metaVIPER algorithm
Source: PubMed Central journal article supplement (PMC5902599; doi:10.1038/s41467-018-03843-3), 2018-04-16
Supplement: 41467_2018_3843_MOESM1_ESM.pdf [file 41467_2018_3843_MOESM1_ESM.pdf]

# **Quantitative Assessment of Protein Activity in Orphan Tissues and Single Cells Using the metaVIPER Algorithm**

## **Supplementary Information**

## 1 Supplementary Table

**Supplementary Table** Interactomes used in this work and datasets used to reverse engineer them.

| Tissue Type                                                      | Expression source | Acronym | # Samples | # Regulators | # Targets | # Interactions | availability    |
|------------------------------------------------------------------|-------------------|---------|-----------|--------------|-----------|----------------|-----------------|
| Bladder urothelial carcinoma                                     | TCGA RNA-Seq      | BLCA    | 427       | 6054         | 19785     | 489101         | aracne.networks |
| Breast invasive carcinoma                                        | TCGA RNA-Seq      | BRCA    | 1212      | 6054         | 19359     | 331919         | aracne.networks |
| Cervical squamous cell carcinoma and endocervical adenocarcinoma | TCGA RNA-Seq      | CESC    | 309       | 6056         | 19839     | 583961         | aracne.networks |
| Colon adenocarcinoma                                             | TCGA RNA-Seq      | COAD    | 500       | 6056         | 19820     | 413789         | aracne.networks |
| Esophageal carcinoma                                             | TCGA RNA-Seq      | ESCA    | 198       | 5961         | 18679     | 529286         | aracne.networks |
| Glioblastoma multiforme                                          | TCGA RNA-Seq      | GBM     | 166       | 6056         | 19858     | 563850         | aracne.networks |
| Head and neck squamous cell carcinoma                            | TCGA RNA-Seq      | HNSC    | 566       | 6055         | 19772     | 423104         | aracne.networks |
| Kidney renal clear cell carcinoma                                | TCGA RNA-Seq      | KIRC    | 606       | 6054         | 19843     | 350478         | aracne.networks |
| Kidney renal papillary cell carcinoma                            | TCGA RNA-Seq      | KIRP    | 323       | 6055         | 19858     | 452653         | aracne.networks |
| Acute myeloid leukemia                                           | TCGA RNA-Seq      | LAML    | 179       | 6007         | 19269     | 531535         | aracne.networks |
| Liver hepatocellular carcinoma                                   | TCGA RNA-Seq      | LIHC    | 423       | 6056         | 19829     | 469922         | aracne.networks |
| Lung adenocarcinoma                                              | TCGA RNA-Seq      | LUAD    | 576       | 6055         | 19742     | 399513         | aracne.networks |
| Lung squamous cell carcinoma                                     | TCGA RNA-Seq      | LUSC    | 552       | 6054         | 19741     | 455032         | aracne.networks |
| Ovarian serous cystadenocarcinoma                                | TCGA RNA-Seq      | OV      | 299       | 6007         | 19140     | 647358         | aracne.networks |
| Pheochromocytoma and paraganglioma                               | TCGA RNA-Seq      | PCPG    | 187       | 6506         | 19861     | 603617         | aracne.networks |
| Prostate adenocarcinoma                                          | TCGA RNA-Seq      | PRAD    | 550       | 6053         | 19820     | 330922         | aracne.networks |
| Rectum adenocarcinoma                                            | TCGA RNA-Seq      | READ    | 177       | 6056         | 19856     | 557911         | aracne.networks |
| Sarcoma                                                          | TCGA RNA-Seq      | SARC    | 265       | 6112         | 20479     | 526591         | aracne.networks |
| Skin cutaneous melanoma                                          | TCGA RNA-Seq      | SKCM    | 472       | 6053         | 19840     | 425361         | aracne.networks |
| Stomach adenocarcinoma                                           | TCGA RNA-Seq      | STAD    | 307       | 6056         | 21663     | 561858         | aracne.networks |
| Testicular germ cell tumors                                      | TCGA RNA-Seq      | TGCT    | 156       | 6056         | 19860     | 432621         | aracne.networks |
| Thyroid carcinoma                                                | TCGA RNA-Seq      | THCA    | 568       | 6053         | 19861     | 317582         | aracne.networks |
| Thymoma                                                          | TCGA RNA-Seq      | THYM    | 122       | 6056         | 19862     | 387923         | aracne.networks |
| Uterine corpus endometrial carcinoma                             | TCGA RNA-Seq      | UCEC    | 581       | 6055         | 19716     | 469845         | aracne.networks |
| T lymphocyte                                                     | Ref. 1            | T       | 233       | 5086         | 13834     | 324963         | figshare        |
| B lymphocyte                                                     | Ref. 2            | B       | 201       | 3651         | 8699      | 207336         | figshare        |
| Skin cutaneous melanoma                                          | TCGA RNA-Seq      | SKCM    | 472       | 6201         | 19840     | 432922         | figshare        |
| Glioblastoma multiforme                                          | REMBRANDT         | NA      | 804       | 3921         | 12683     | 482879         | figshare        |
| Glioblastoma multiforme                                          | Ref. 3            | NA      | 176       | 3099         | 8964      | 382144         | figshare        |
| Glioblastoma multiforme                                          | TCGA affymetrix   | NA      | 202       | 3433         | 9812      | 421108         | figshare        |
| Glioblastoma multiforme                                          | TCGA agilent      | NA      | 202       | 5560         | 17355     | 988514         | figshare        |

## 2 Supplementary Figures

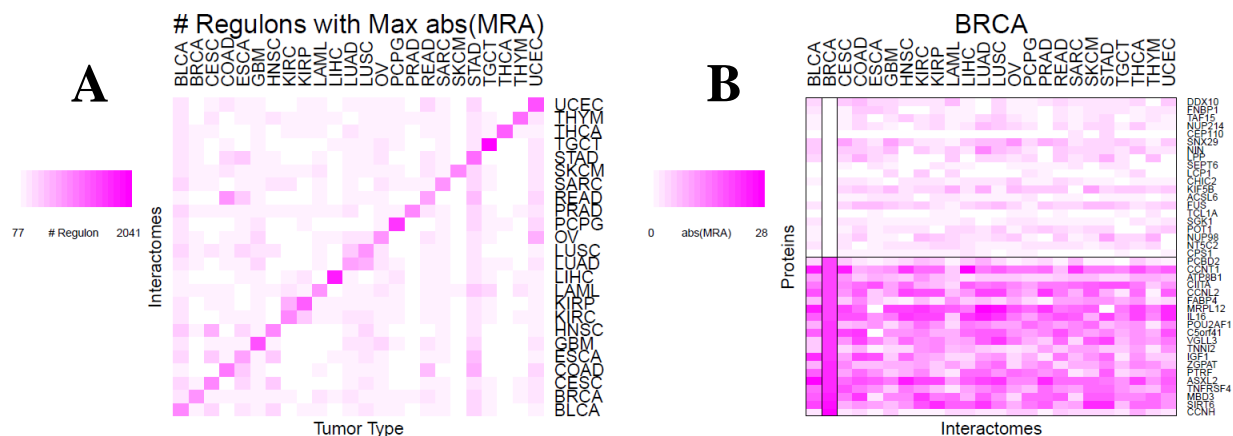

**Supplementary Figure 1: Highest absolute NES values are obtained from tissue-matched interactomes.** A) Since tissue-matching regulons are in general best models for proteins in that specific tissue, we conclude that correctly assessed regulons usually give high absolute activity. This is demonstrated by that across all tissue types, tissue-matching interactome harbors the most regulons with highest absolute activity. B) In some particular cases, tissue-matching regulons may not constitute the best model. For instance, as shown, in breast invasive carcinoma (BRCA), proteins in the upper panel are best modeled by regulons from other tissues. Also, in some cases, tissue-matching regulons may not be the only appropriate model. For instance, besides BRCA regulons, proteins in the lower panel can also be appropriately modeled by regulons from other tissue types.

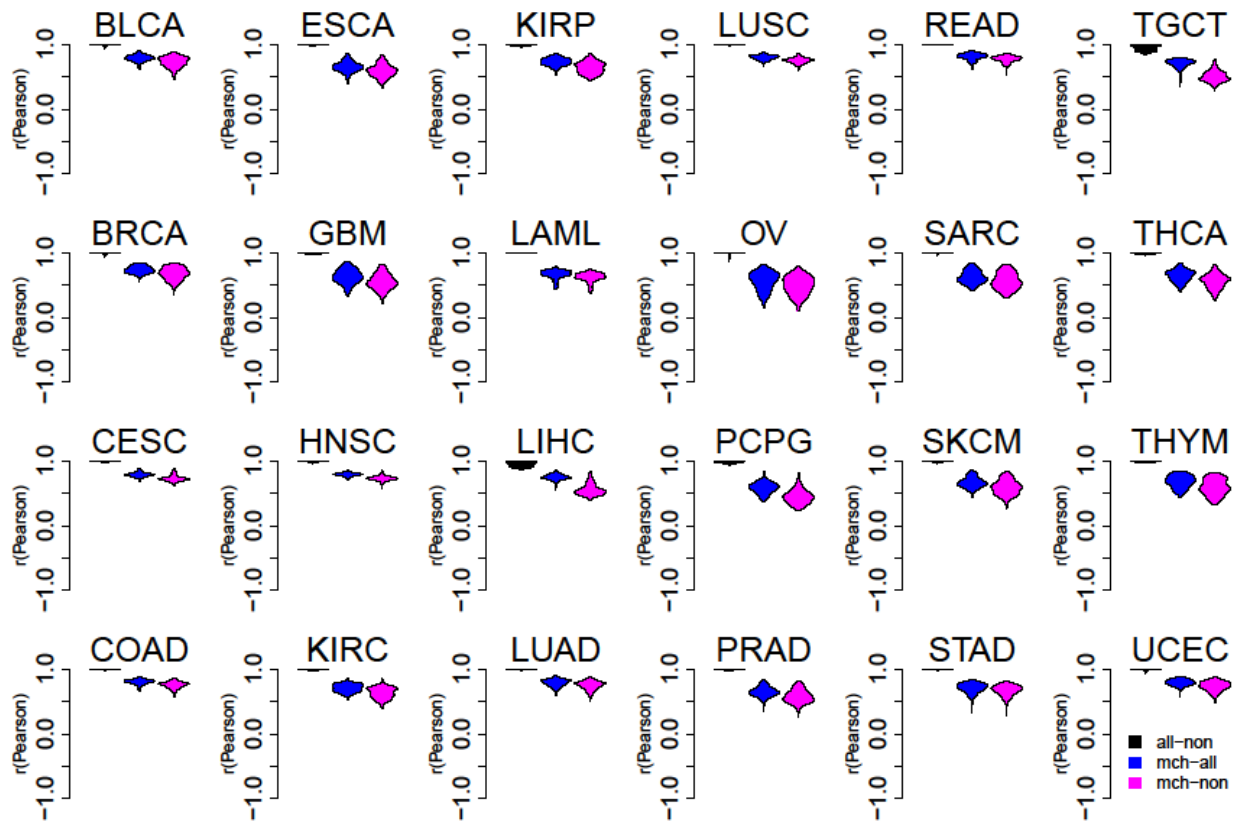

**Supplementary Figure 2: Inference protein activity for orphan tissues.** Correlation of protein activity inferred from 1) metaVIPER, with all available interactomes (all), 2) metaVIPER, with all non-matching interactomes (non) and 3) VIPER with matching interactome (mch). Then violin plots show the probability density distribution for the Pearson's correlation coefficient for each of the evaluated tissue types.

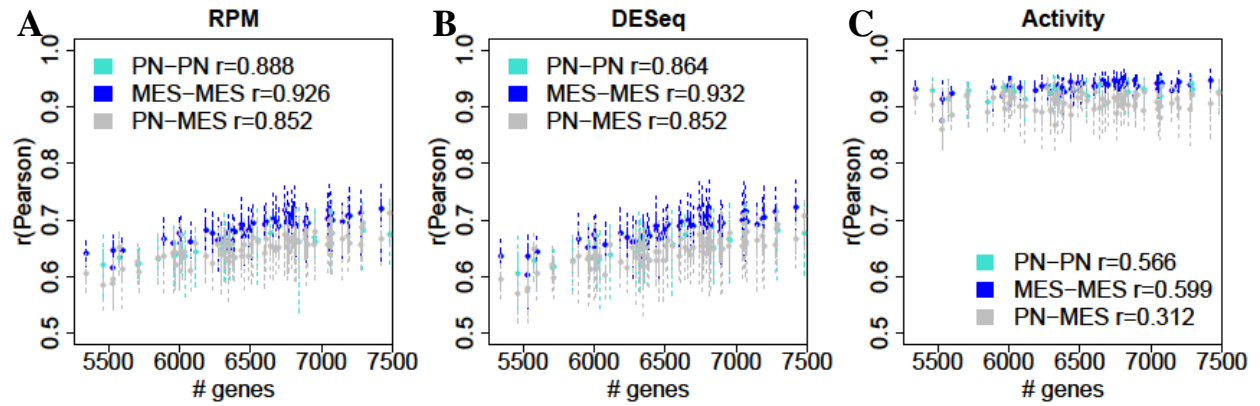

**Supplementary Figure 3: Single cell quality as confounding factor in understanding heterogeneity and regulatory properties.** With expression measured by both  $\log_2(\text{rpm}+1)$  (A) and variance stabilizing transformation (VST) in DESeq R package<sup>4</sup>(B), cells with higher quality (higher number of genes detected) tend to have higher correlation with other cells. In some cases, inter-population correlation between high quality cells even exceeds intra-population correlation between low quality cells. This is no longer seen with metaVIPER predicted protein activity (C), indicating it to be a more robust measurement of heterogeneity and regulatory properties from single cells.

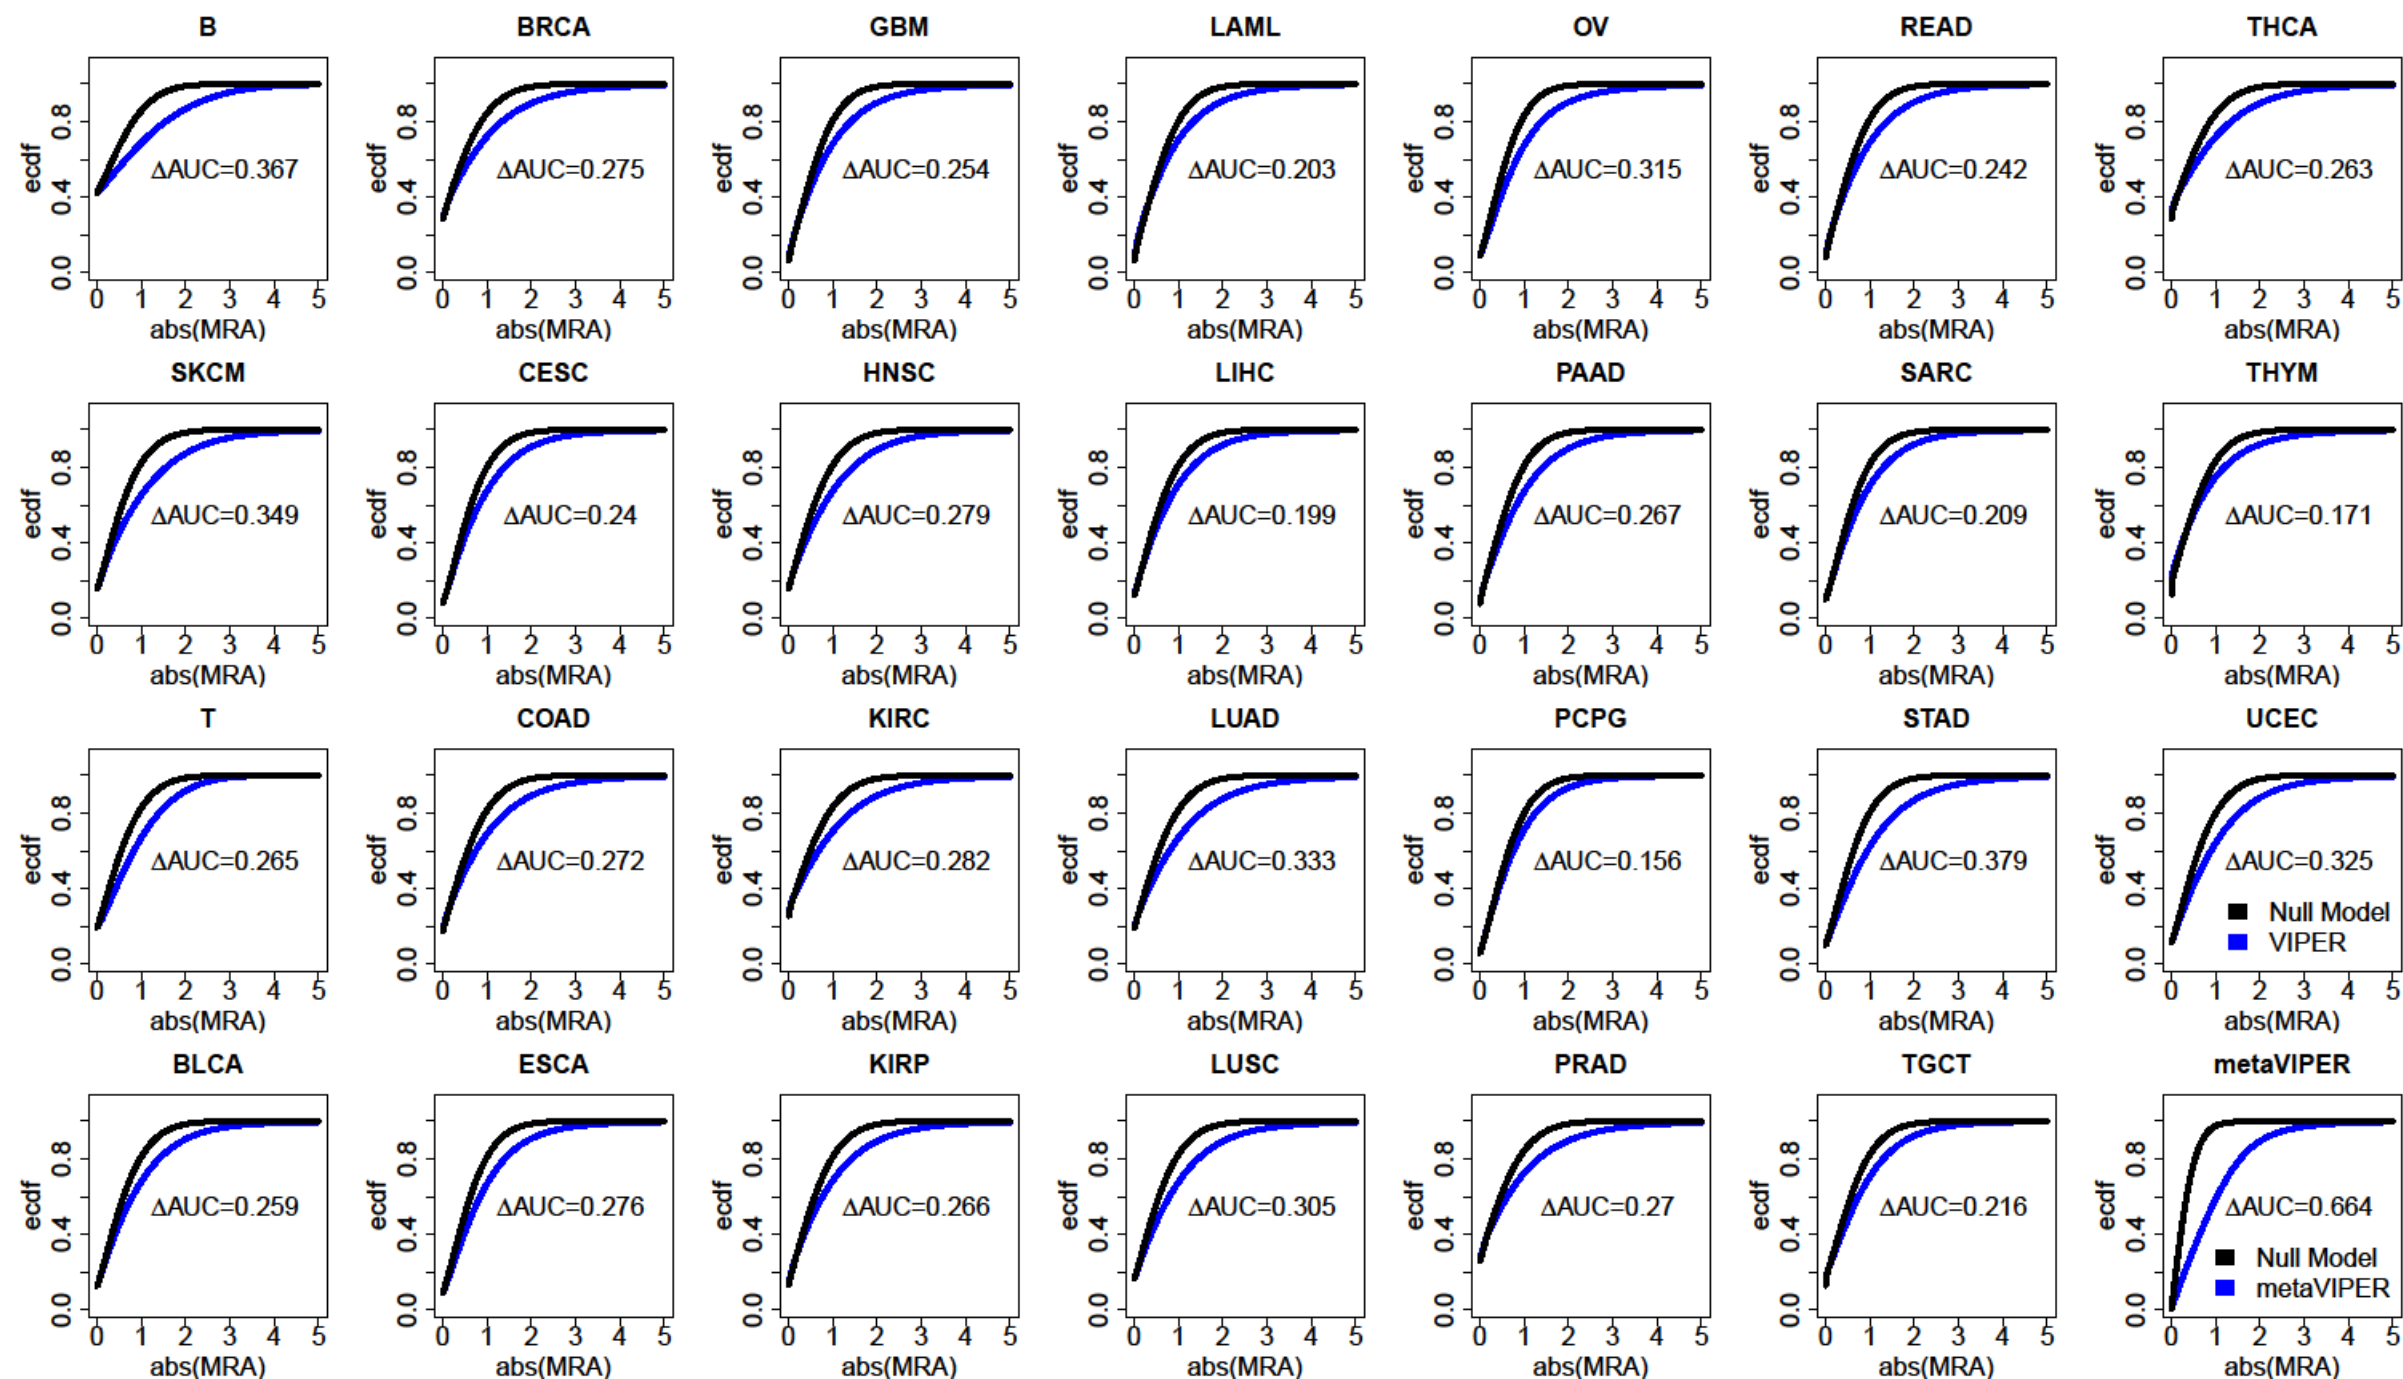

**Supplementary Figure 4: metaVIPER integration outperforms analysis with single interactome.** As shown in Supplementary Fig 1, for a single cell type, the tissue-matched regulatory model usually gives the highest absolute protein activity inferences. That is to say, in a scenario where different cell types exist, the best regulatory model will give high variance of protein activity across the dataset. We compared the variance of protein activity inferences based on VIPER analysis across 27 distinct tissue-lineage contexts with that of metaVIPER integration. In all cases, metaVIPER outperformed the VIPER analysis. The figures show the  $\Delta$ AUC between ecdf curve for a null model, built by uniformly shuffling the expression profile sample-wise (shown in black), and that of VIPER/metaVIPER analysis (shown in red), among which metaVIPER gives the highest value.

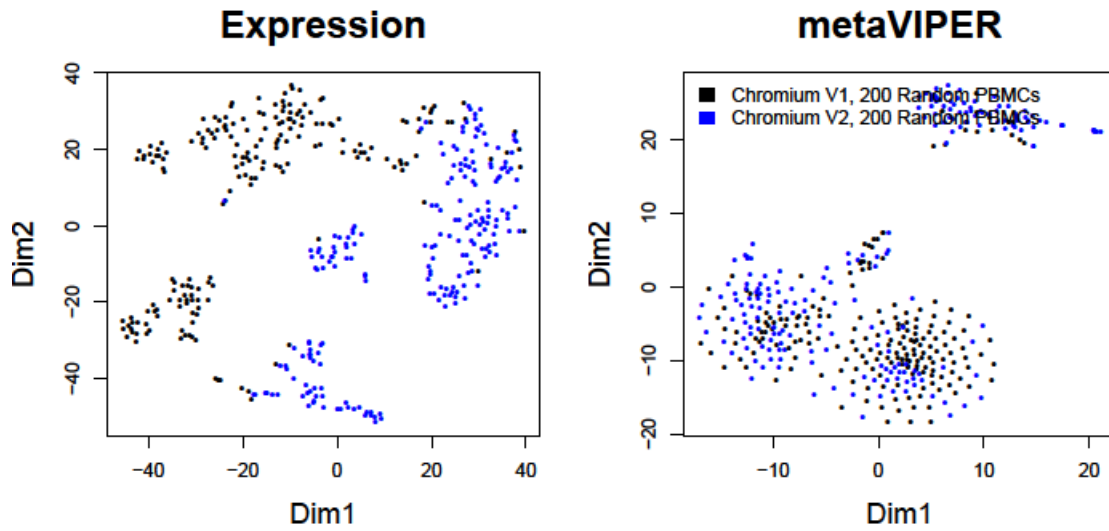

**Supplementary Figure 5: metaVIPER reduces discrepancies between different scRNA-Seq data sources.** We analyzed filtered PBMC scRNA-Seq data generated using 10x Genomics V1 (Black) and V2 (Blue) chemistry. To make them comparable, we randomly selected 200 single cells for each data sources. Discrepancies between different scRNA-Seq data sources were observed using expression, while no longer seen using metaVIPER predicted protein activity.

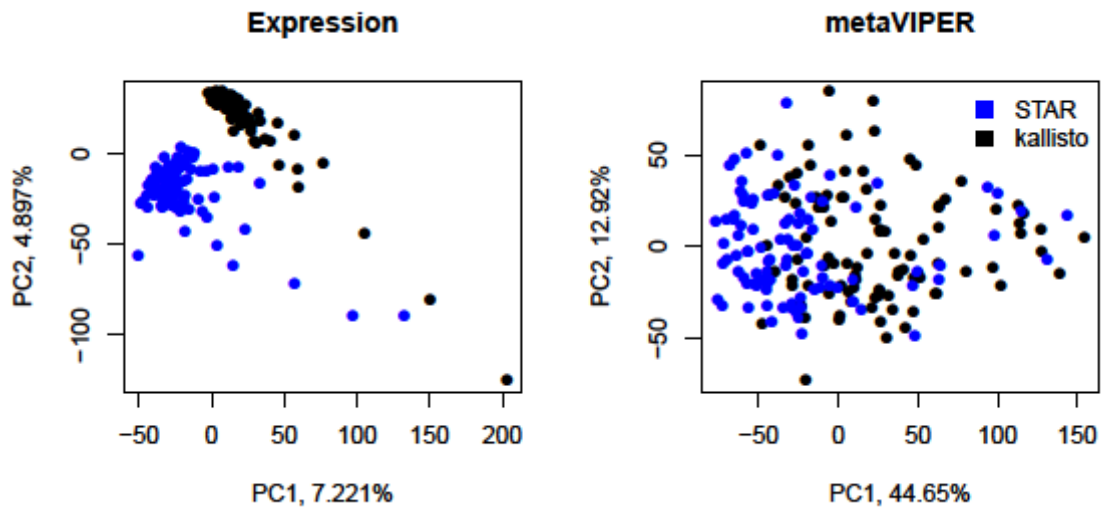

**Supplementary Figure 6: metaVIPER reduces discrepancies between different expression quantification tools.** We analyzed scRNA-Seq data reported by Wu et al.<sup>5</sup>. Transcriptomic profiles were quantified using STAR<sup>6</sup> (Blue) and kallisto<sup>7</sup> (Black). Discrepancies between different expression quantification tools were no longer seen using metaVIPER predicted protein activity.



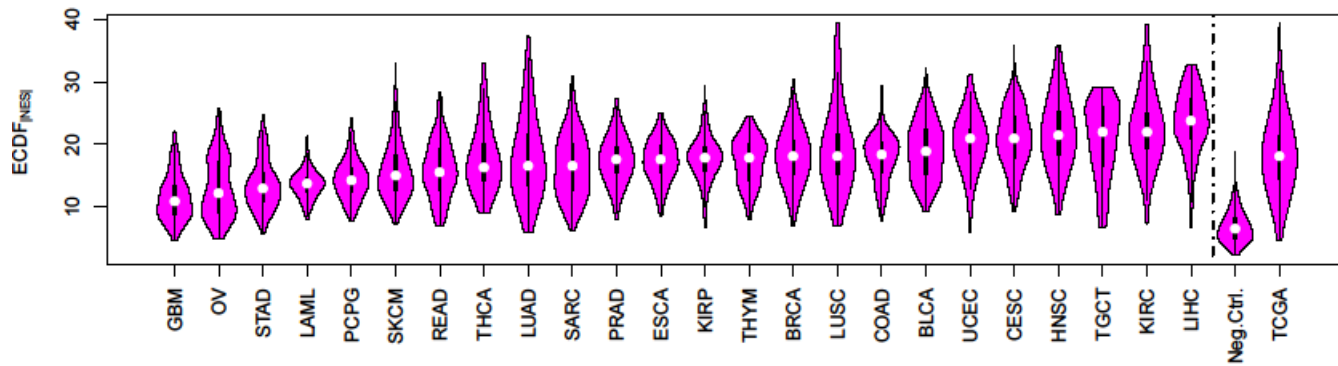

**Supplementary Figure 7: Quality control for protein activity analysis.** Since properly assigned regulons give high absolute normalized enrichment score (Supplementary Figure 1), therefore we use the *Empirical Cumulative Distribution Function* of the absolute value of the VIPER *Normalized Enrichment Score* ( $ECDF_{NES}$ ) of all proteins with significant predicted activity to estimate whether the protein activity analysis is satisfactory. We provided the distribution of the proposed score within each tumor type (GBM, OV etc.) as well as among all TCGA samples (TCGA) using tissue-matching interactome as references for trustworthy protein activity analysis. We also analyzed LAML samples with GBM interactome, which is completely misassigned (LAML and GBM have distinct lineage origination) as the negative control (Neg.Ctrl.). If metaVIPER analysis gives similar result, probably the included interactomes don't have a satisfactory coverage on regulatory information of the analyzed samples.

## References

1. Della Gatta, G. et al. Reverse engineering of TLX oncogenic transcriptional networks identifies RUNX1 as tumor suppressor in T-ALL. *Nat Med* 18, 436-440 (2012).
2. Lefebvre, C. et al. A human B-cell interactome identifies MYB and FOXM1 as master regulators of proliferation in germinal centers. *Mol Syst Biol* 6, 377 (2010).
3. Phillips, H. S. et al. Molecular subclasses of high-grade glioma predict prognosis, delineate a pattern of disease progression, and resemble stages in neurogenesis. *Cancer Cell* 9, 157-173 (2006).
4. Anders, S. & Huber, W. Differential expression analysis for sequence count data. *Genome Biol* 11, R106 (2010).
5. Wu, A. R. et al. Quantitative assessment of single-cell RNA-sequencing methods. *Nature methods* 11.1, 41-46 (2014).
6. Dobin, A, et al. STAR: ultrafast universal RNA-seq aligner. *Bioinformatics* 29.1, 15-21 (2013).
7. Bray, N. L. et al. Near-optimal probabilistic RNA-seq quantification, *Nature Biotechnology* 34, 525–527 (2016).
